# Supplementary material for: Arrays of CdSe sensitized ZnO/ZnSe nanocables for efficient solar cells with high open-circuit voltage
Source: Royal Society of Chemistry journal article supplement (doi:10.1039/c2jm31970e), 2012-01-01
Supplement: c2jm31970e.pdf [file c2jm31970e.pdf]

# Electronic Supplementary Information

Arrays of CdSe Sensitized ZnO/ZnSe Nanocables for Efficient Solar Cells

with High Open-Circuit Voltage

Jun Xu, Xia Yang, Qing-Dan Yang, Tai-Lun Wong, Shuit-Tong Lee, Wen-Jun Zhang and Chun-Sing

Lee\*

Department of Physics and Materials Science, City University of Hong Kong, Hong Kong SAR, (P. R.

China); Center of Super-Diamond and Advanced Films (COSDAF), City University of Hong Kong,

Hong Kong SAR, (P. R. China)

\* To whom all correspondences should be addressed. E-mail: [apcslee@cityu.edu.hk](mailto:apcslee@cityu.edu.hk) (C.S. Lee)

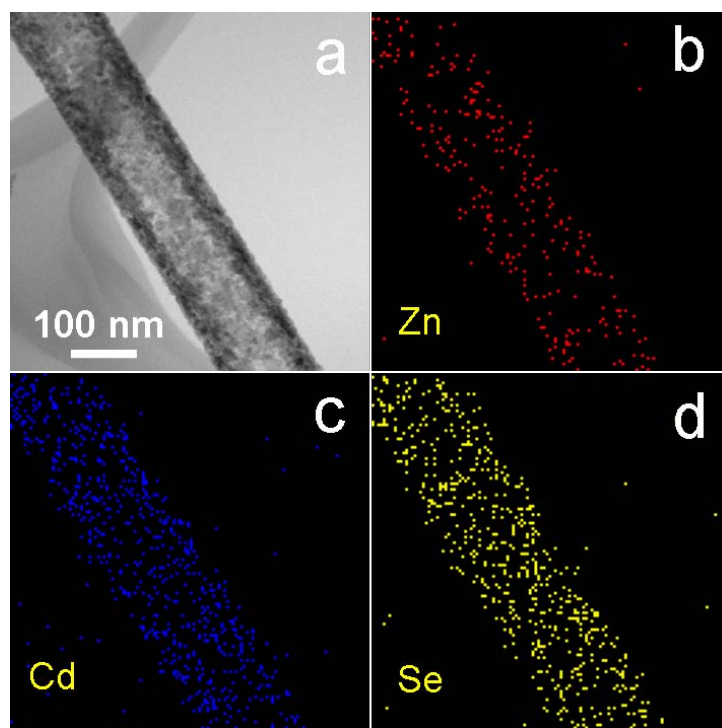

Fig. S1 (a) TEM image and (b-d) EDS mappings of a ZnSe/CdSe (55 °C) nanotube, showing homogeneous distribution of Zn, Cd, and Se throughout the tube.

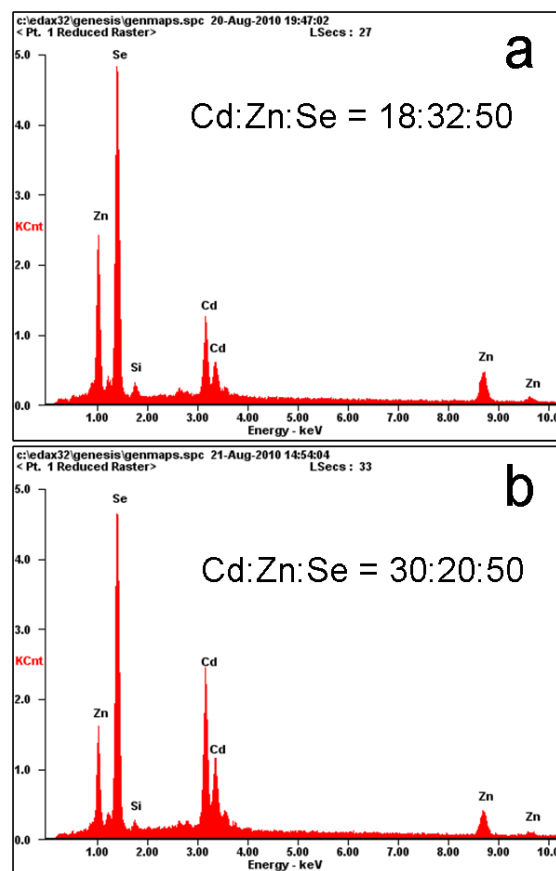

Fig. S2 EDS spectra of (a) ZnSe/CdSe (55 °C) nanotubes and (b) ZnSe/CdSe (90 °C) nanotubes prepared, respectively, by immersing the ZnO/ZnSe/CdSe (55 °C) nanocables and the ZnO/ZnSe/CdSe (90 °C) nanocables in an acetic solution to remove the inner ZnO cores.
